# Supplementary material for: Eco-evolutionary Modelling of Global Vegetation Dynamics and the Impact of CO 2 during the late Quaternary: Insights from Contrasting Periods
Source: Copernicus journal article supplement (doi:10.5194/egusphere-2024-3897), 2025-01-06
Supplement: Supplementary file 1 [file egusphere-2024-3897-supplement.pdf]

## SUPPLEMENTARY MATERIAL

This Supplementary contains the following tables and figures:

SI Table 1. Characteristics of the Last Glacial Maximum (LGM), mid-Holocene (MH) and pre-industrial (PI) Max Planck Institute Earth System Model (MPI-ESM1.2-LR; Mauritsen et al., 2019; doi:10.22033/ESGF/CMIP6.6642) simulations used to provide inputs for our experiments, including specified forcings.

SI Table 2. Regional contributions to total annual gross primary production (GPP) in the tropics, the northern extra-tropics (NET) and the southern extra-tropics (SET) in the Last Glacial Maximum (LGM), the mid-Holocene (MH) shown in the factorial experiments holding all but one variable constant.

SI Table 3. Gross primary production at the Last Glacial Maximum (LGM), mid-Holocene (MH) and the pre-industrial (PI) as simulated by earth system models participating in the fourth phase of the Palaeoclimate Modelling Intercomparison Project (PMIP4; Kageyama et al., 2017; Otto-Bleisner et al., 2019).

SI Figure 1. Change in C<sub>4</sub> fraction (a) at the Last Glacial Maximum (LGM) compared to the pre-industrial (PI) experiment and (b) in the mid-Holocene (MH) compared to the PI experiment.

SI Figure 2. Simulated change in total annual gross primary production (GPP) between the pre-industrial (PI) and (a) the Last Glacial Maximum (LGM) and (b) the mid-Holocene (MH) as a result of holding all variables constant except climate.

SI Figure 3. Simulated change in total annual gross primary production (GPP) between the pre-industrial (PI) and (a) the Last Glacial Maximum (LGM) and (b) the mid-Holocene (MH) as a result of holding all variables constant except CO<sub>2</sub>.

SI Figure 4. Simulated change in total annual gross primary production (GPP) between the pre-industrial (PI) and (a) the Last Glacial Maximum (LGM) and (b) the mid-Holocene (MH) as a result of holding all variables constant except light (photosynthetic photon flux density, PPFD).

SI Figure 5. Simulated changes in (a) mean annual temperature and (b) mean annual precipitation between the pre-industrial (PI) and the Last Glacial Maximum (LGM); simulated changes in (c) mean annual temperature and (d) mean annual precipitations between the pre-industrial (PI) and the mid-Holocene (MH).

SI Figure 6. Simulated change in C<sub>4</sub> fraction between the pre-industrial (PI) and (a) the Last Glacial Maximum (LGM) and (b) the mid-Holocene (MH) as a result of holding all variables constant except climate.

SI Figure 7. Simulated change in C<sub>4</sub> fraction between the pre-industrial (PI) and (a) the Last Glacial Maximum (LGM) and (b) the mid-Holocene (MH) as a result of holding all variables constant except CO<sub>2</sub>.

SI Figure 8. Simulated change in C4 fraction between the pre-industrial (PI) and (a) the Last Glacial Maximum (LGM) and (b) the mid-Holocene (MH) as a result of holding all variables constant except light (photosynthetic photon flux density, PPFD).

SI Table 1. Characteristics of the Last Glacial Maximum (LGM), mid-Holocene (MH) and pre-industrial (PI) Max Planck Institute Earth System Model (MPI-ESM1.2-LR; Mauritsen et al., 2019; doi:10.22033/ESGF/CMIP6.6642) simulations used to provide inputs for our experiments, including specified forcings.

|                            | PI        | MH        | LGM                                                   |
|----------------------------|-----------|-----------|-------------------------------------------------------|
| Eccentricity               | 0.016764  | 0.018682  | 0.018994                                              |
| Obliquity (°)              | 23.459    | 24.105    | 22.949                                                |
| Perihelion -180            | 100.33    | 0.87      | 114.42                                                |
| CO2 (ppm)                  | 284.3     | 264.4     | 190                                                   |
| CH4 (ppb)                  | 808.2     | 597       | 375                                                   |
| N2O (ppb)                  | 273.0     | 262       | 200                                                   |
| Ice sheet                  | as modern | as modern | ICE6G_C                                               |
| Spin-up                    | 2000      | 500       | 3850 years after restart from previous LGM simulation |
| Length of simulation (yrs) | 1000      | 500       | 500                                                   |

SI Table 2. Regional contributions to total annual gross primary production (GPP, PgC) in the tropics, the northern extra-tropics (NET) and the southern extra-tropics (SET) in the Last Glacial Maximum (LGM), the mid-Holocene (MH) shown in the factorial experiments holding all but one variable constant.

| <b>Region</b>      | <b>Time period</b> | <b>Climate</b> | <b>CO2</b> | <b>PPFD</b> |
|--------------------|--------------------|----------------|------------|-------------|
| Tropics (25°N-25S) | LGM                | -3.5           | -4.7       | 0.2         |
| NET (>25°N)        | LGM                | -11.2          | -6.5       | 1.0         |
| SET (>25°S)        | LGM                | -0.1           | -1.0       | 0.0         |
| Tropics (25°N-25S) | MH                 | 0.9            | -1.2       | -0.5        |
| NET (>25°N)        | MH                 | 1.5            | -1.2       | 1.5         |
| SET (>25°S)        | MH                 | -0.5           | -0.2       | 0.0         |

SI Table 3. Gross primary production (Pg C yr) at the Last Glacial Maximum (LGM), mid-Holocene (MH) and the pre-industrial (PI) as simulated by earth system models participating in the fourth phase of the Palaeoclimate Modelling Intercomparison Project (PMIP4; Kageyama et al., 2017; Otto-Bleisner et al., 2019).

| <b>Model</b>   | <b>LGM</b> | <b>MH</b> | <b>PI</b> |
|----------------|------------|-----------|-----------|
| MPI-ESM1-2-LR  | 67.8       | 116.9     | 121       |
| AWI-ESM-1-1-LR | 61.4       | 106.5     | 95        |
| INM-CM4-8      | 110.7      | 137.5     | 140.6     |
| MIROC-ES2L     | 108.6      | 146.1     | 151.7     |
| NCAR.CESM2     | n/a        | 103.8     | 115.0     |
| IPSL-CM6A-LR   | n/a        | 106.7     | 116.0     |
| NorESM2-LM     | n/a        | 123.7     | 134.2     |
| ACCESS-ESM1-5  | n/a        | 97.9      | 105.6     |
| GISS-E2-1-G    | n/a        | 106.0     | 121.1     |

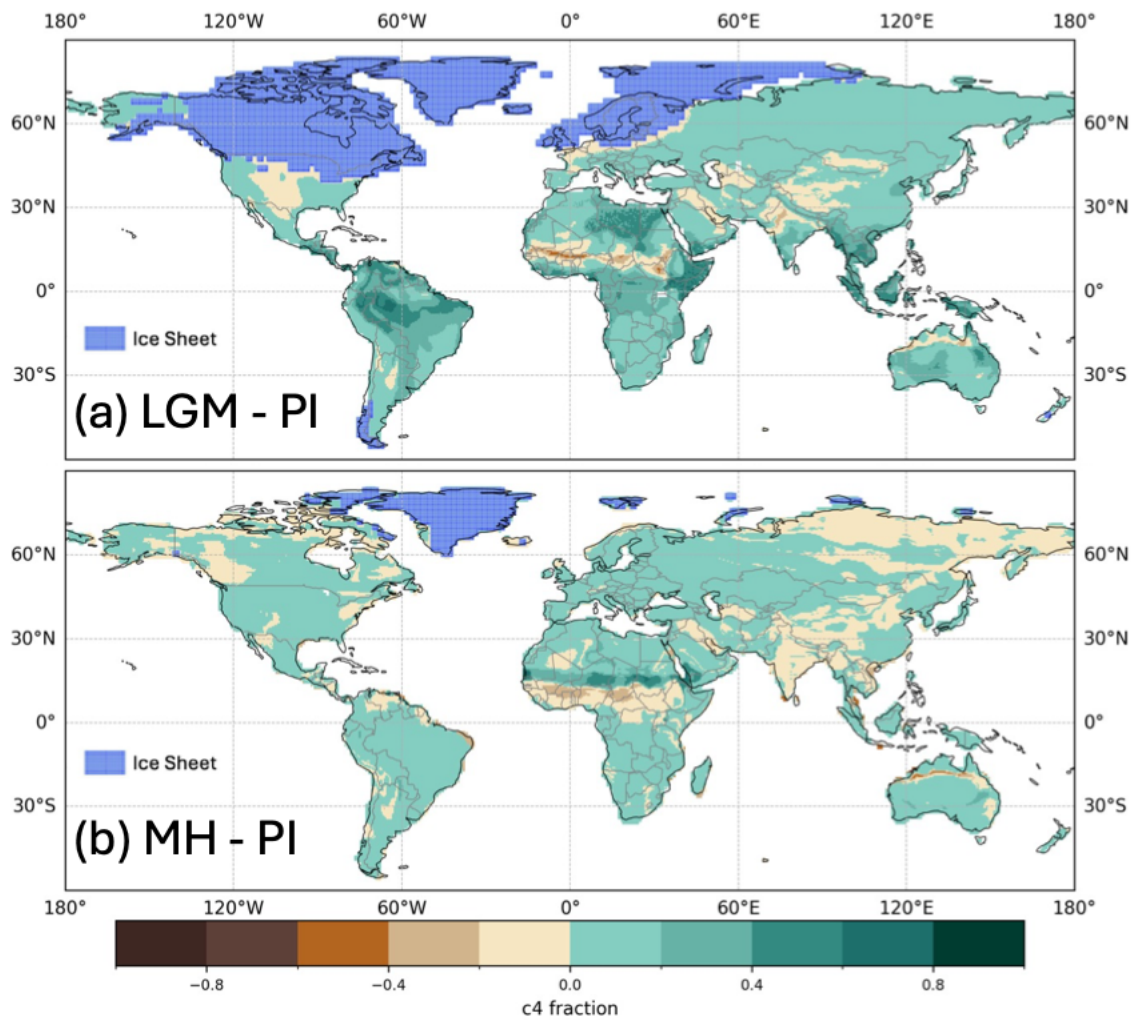

SI Figure 1. Change in  $C_4$  fraction (a) at the Last Glacial Maximum (LGM) compared to the pre-industrial (PI) experiment and (b) in the mid-Holocene (MH) compared to the PI experiment.

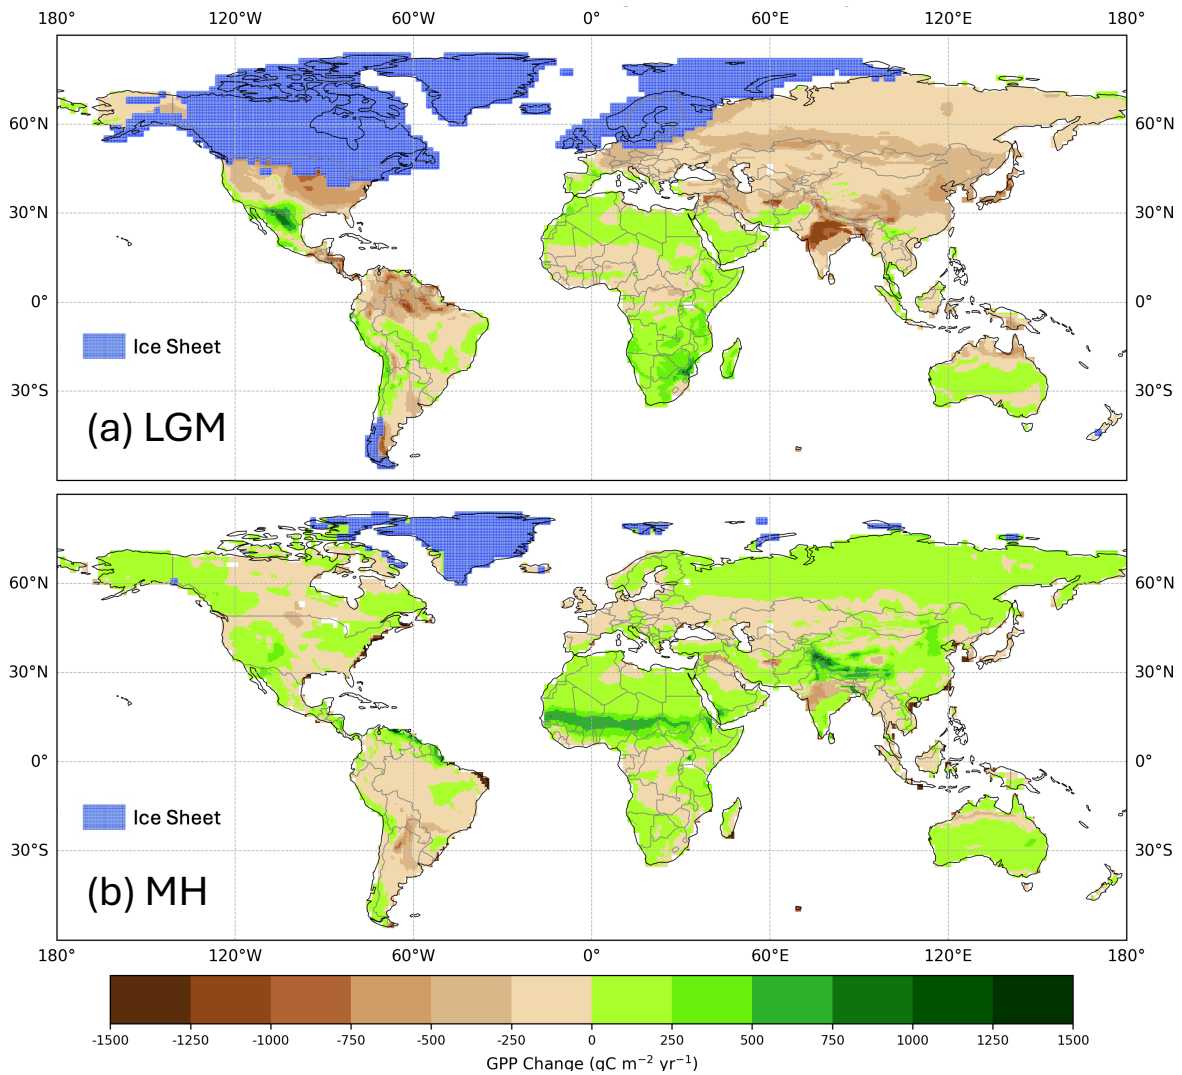

SI Figure 2. Simulated change in total annual gross primary production (GPP) between the pre-industrial (PI) and (a) the Last Glacial Maximum (LGM) and (b) the mid-Holocene (MH) as a result of holding all variables constant except climate.

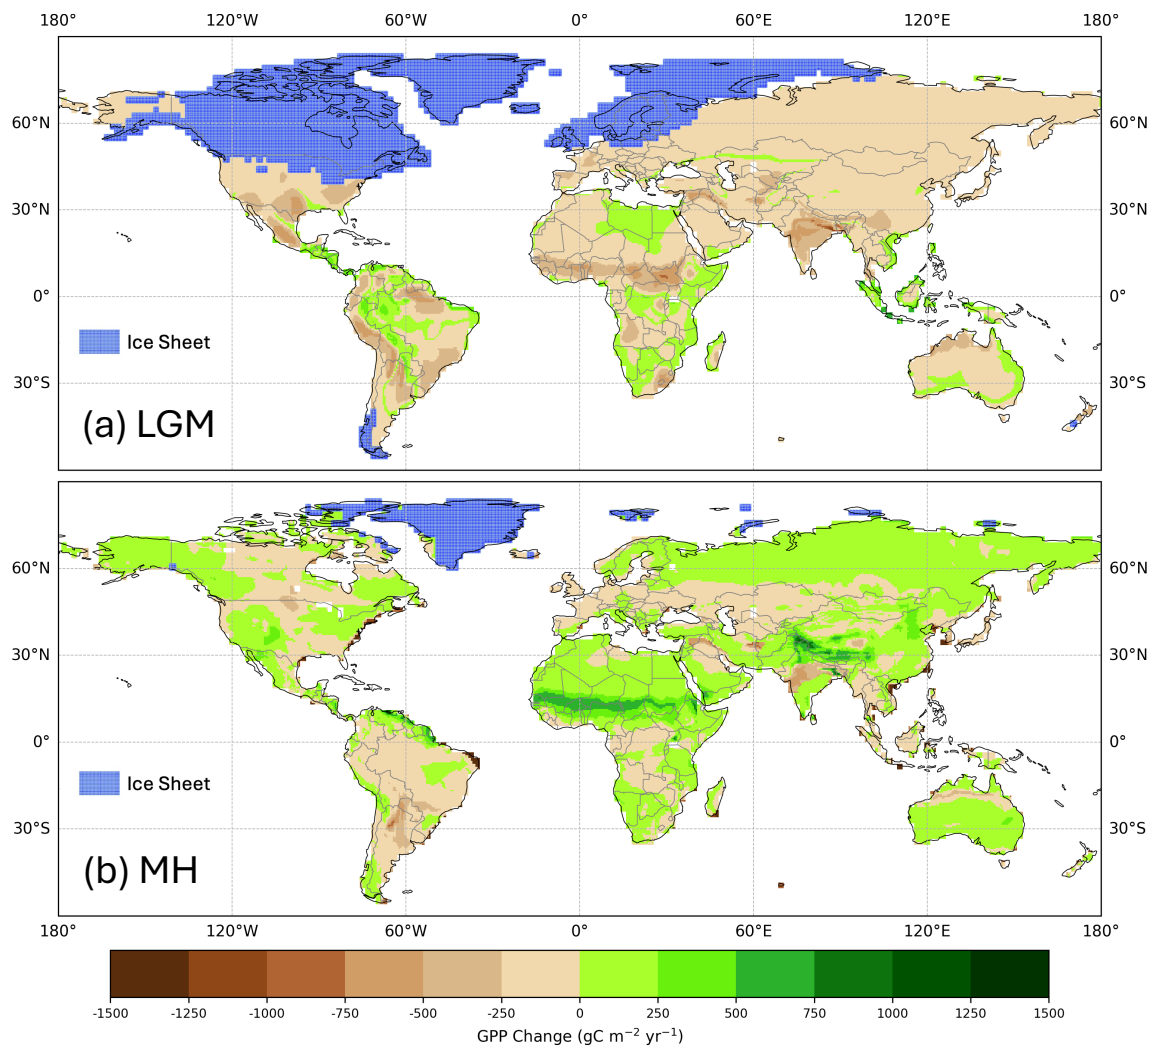

SI Figure 3. Simulated change in total annual gross primary production (GPP) between the pre-industrial (PI) and (a) the Last Glacial Maximum (LGM) and (b) the mid-Holocene (MH) as a result of holding all variables constant except  $\text{CO}_2$ .

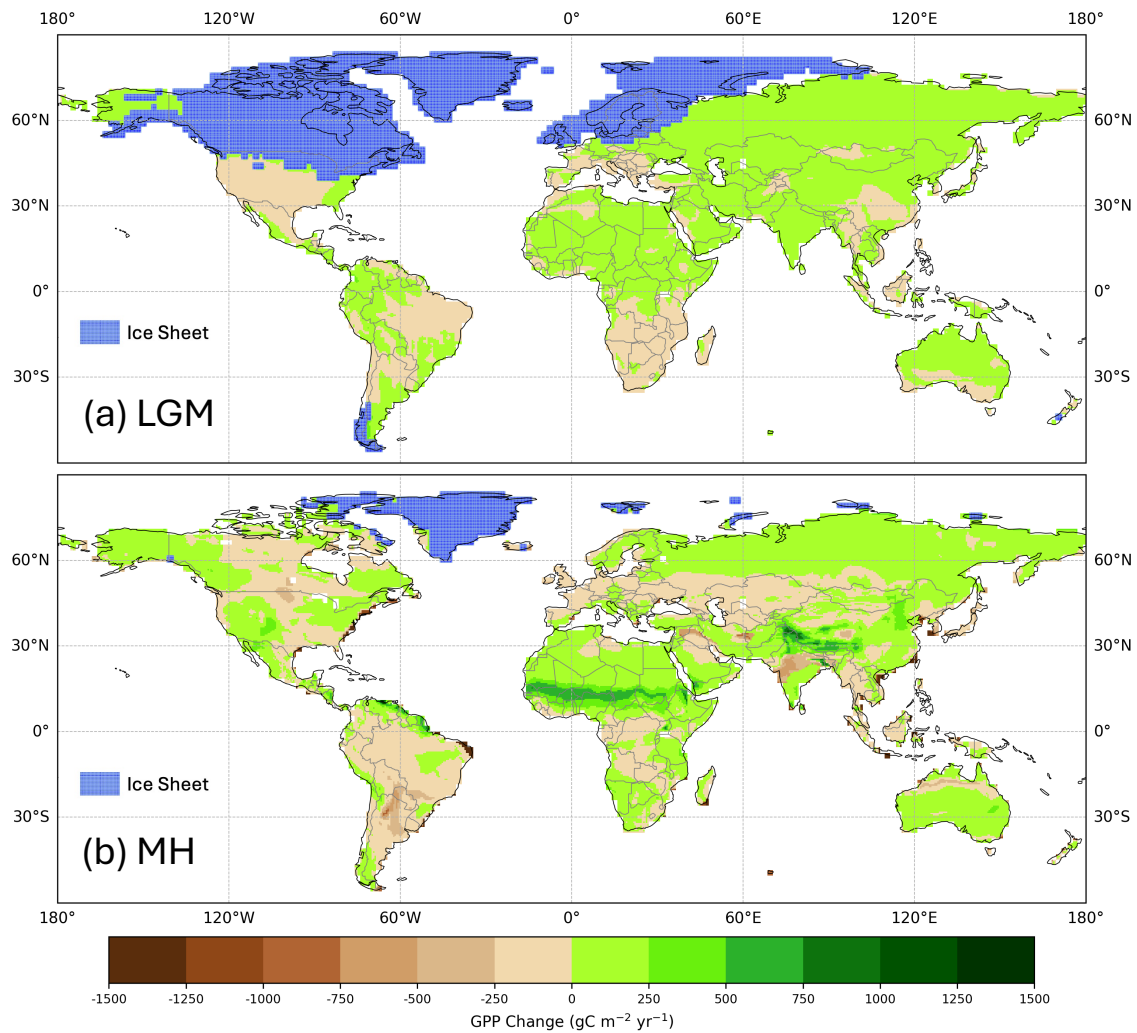

SI Figure 4. Simulated change in total annual gross primary production (GPP) between the pre-industrial (PI) and (a) the Last Glacial Maximum (LGM) and (b) the mid-Holocene (MH) as a result of holding all variables constant except light (photosynthetic photon flux density, PPFD).



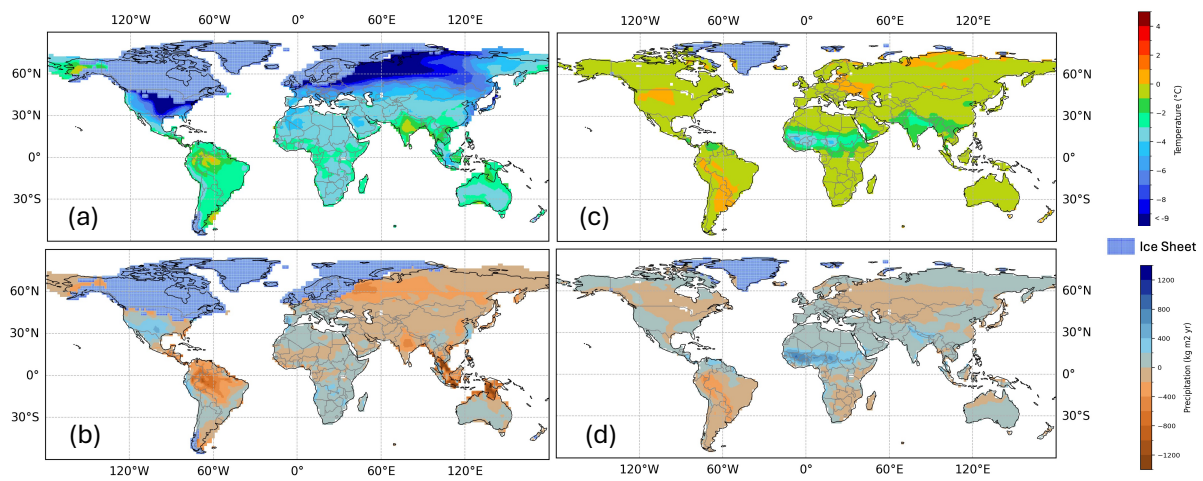

SI Figure 5. Simulated changes in (a) mean annual temperature and (b) mean annual precipitation between the pre-industrial (PI) and the Last Glacial Maximum (LGM); simulated changes in (c) mean annual temperature and (d) mean annual precipitation between the pre-industrial (PI) and the mid-Holocene (MH).

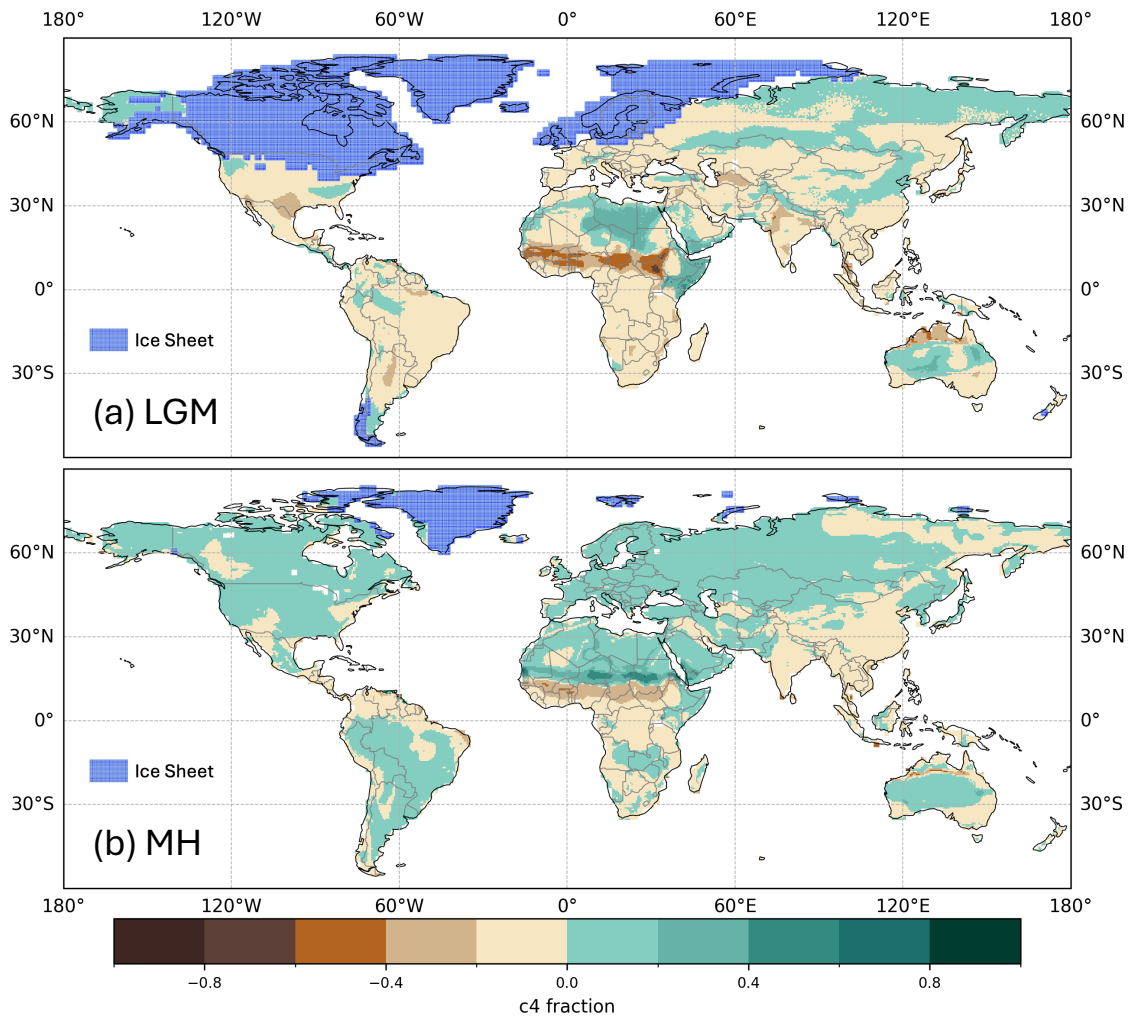

SI Figure 6. Simulated change in C<sub>4</sub> fraction between the pre-industrial (PI) and (a) the Last Glacial Maximum (LGM) and (b) the mid-Holocene (MH) as a result of holding all variables constant except climate.

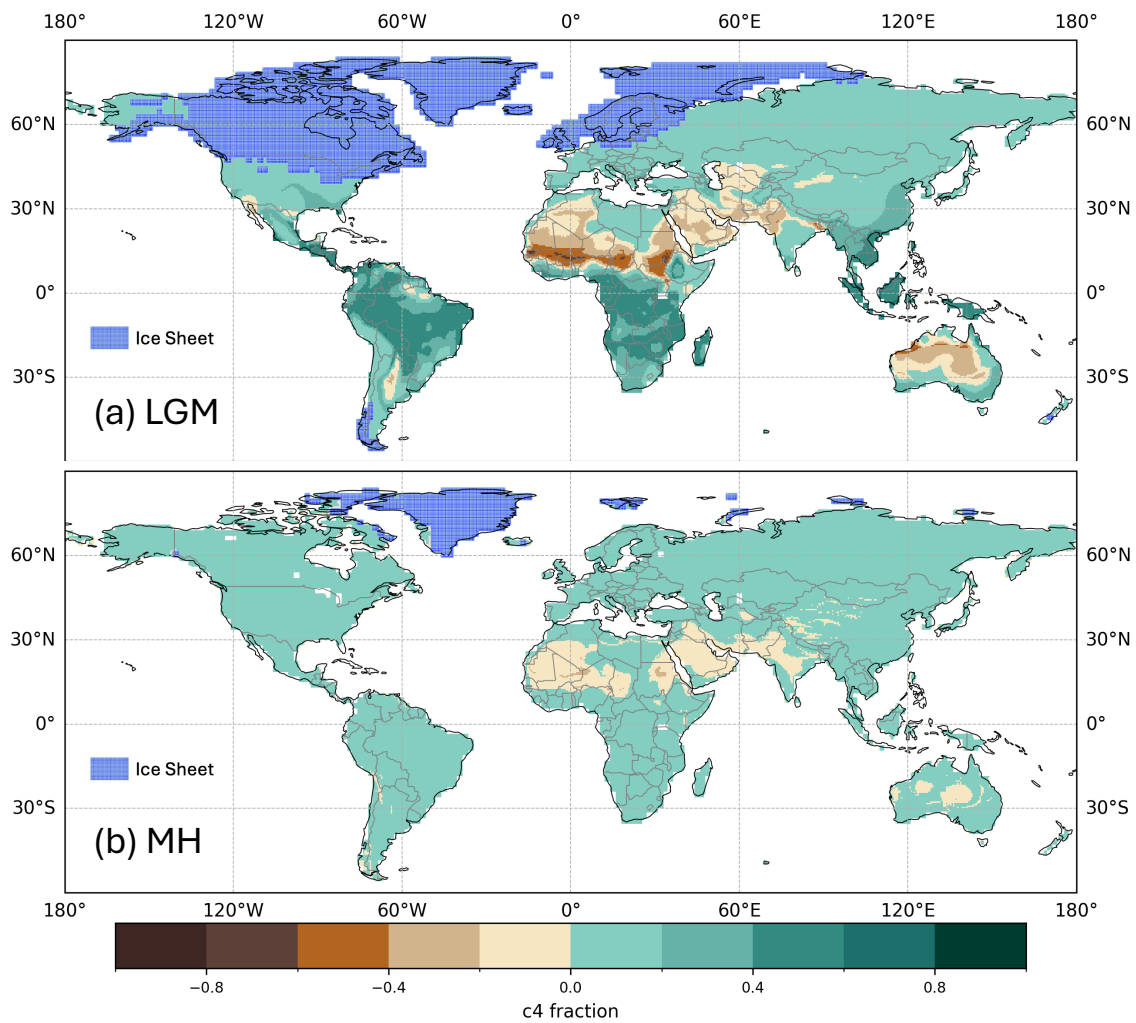

SI Figure 7. Simulated change in C4 fraction between the pre-industrial (PI) and (a) the Last Glacial Maximum (LGM) and (b) the mid-Holocene (MH) as a result of holding all variables constant except CO<sub>2</sub>.

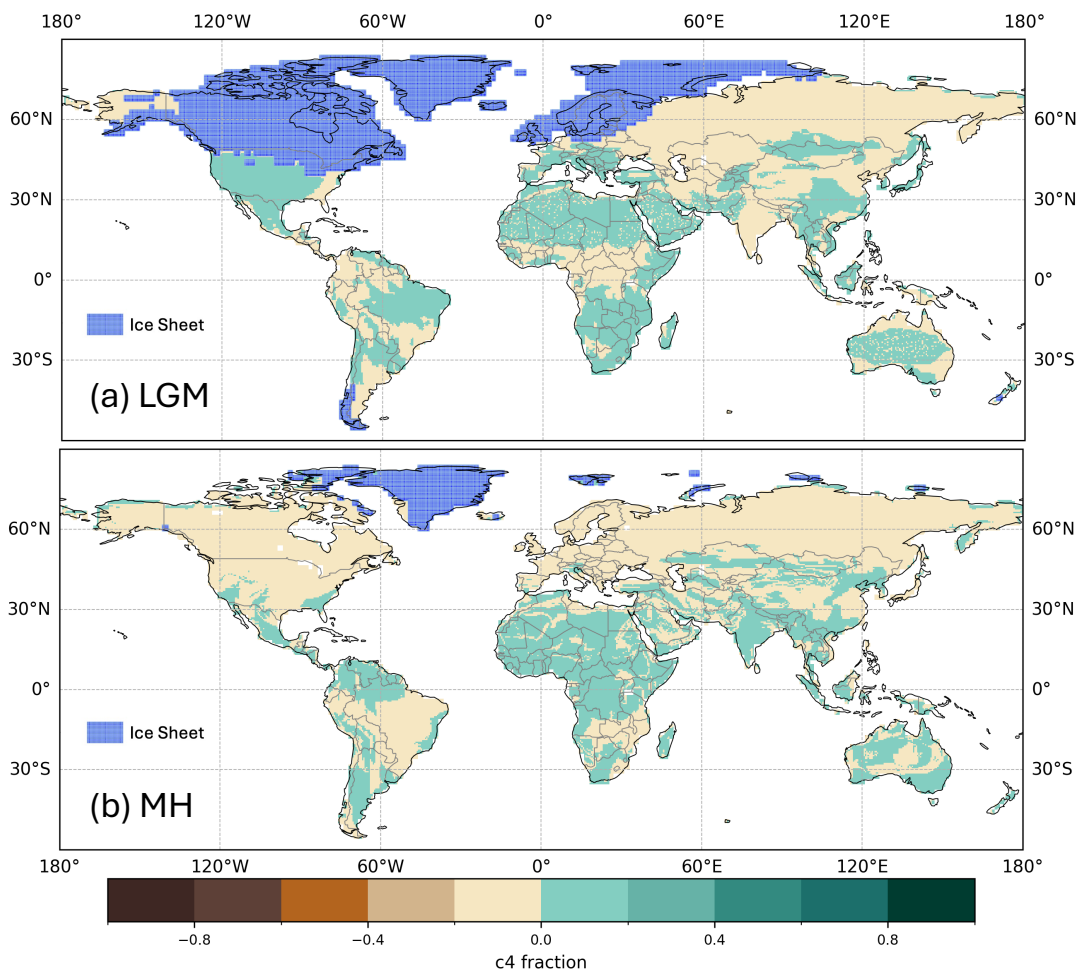

SI Figure 8. Simulated change in C4 fraction between the pre-industrial (PI) and (a) the Last Glacial Maximum (LGM) and (b) the mid-Holocene (MH) as a result of holding all variables constant except light (photosynthetic photon flux density, PPFD).

### Supplementary References

- Kageyama, M., Albani, S., Braconnot, P., Harrison, S.P., Hopcroft, P.O., Ivanovic, R.F., Lambert, F., Marti, O., Peltier, W.R., Peterschmidt, J.-Y., Roche, D.M., Tarasov, L., Zhang, X., Brady, E., Haywood, A.M., LeGrande, A., Lunt, D.J., Mahowald, N.M., Mikolajewicz, U., Nisancioglu, K.H., Otto-Bliesner, B.L., Renssen, H., Tomas, B., Zhang, Q., Abe-Ouchi, A., Bartlein, P.J., Cao, J., Lohmann, G., Ohgaito, R., Shi, X., Volodin, E., Yoshida, K., Zhang, X., and Zheng, W.: The PMIP4 contribution to CMIP6 – Part 4: Scientific objectives and experimental design of the PMIP4-CMIP6 Last Glacial Maximum experiments and PMIP4 sensitivity experiments, *Geosci. Model Dev.*, 10, 4035-4055, <https://doi.org/10.5194/gmd-10-4035-2017>, 2017
- Mauritsen, T., Bader, J., Becker, T., Behrens, J., Bittner, M., Brokopf, R., et al.: Developments in the MPI-M Earth System Model version 1.2 (MPI-ESM1.2) and its

response to increasing CO<sub>2</sub>, *J. Advan. Modeling Earth Systems*, 11, 998–1038, <https://doi.org/10.1029/2018MS001400>, 2019.

Otto-Bliesner, B.L., Braconnot, P., Harrison, S.P., Lunt, D.J., Abe-Ouchi, A., Albani, S., Bartlein, P.J., Capron, E., Carlson, A.E., Dutton, A., Fischer, H., Goelzer, H., Govin, A., Haywood, A., Joos, F., Legrande, A.N., Lipscomb, W.H., Lohmann, G., Mahowald, N., Nehrbass-Ahles, C., Pausata, F.S.R., Peterschmidt, J-Y., Phipps, S.J., Renssen, R., and Zhang, Q.: The PMIP4 contribution to CMIP6 – Part 2: Two interglacials, scientific objective and experimental design for Holocene and Last Interglacial simulations, *Geosci. Model Dev.*, 10, 3979-4003, <https://doi.org/10.5194/gmd-10-1-2017>, 2017
